# Supplementary material for: Dietary Behaviors in Gaelic Football: A Mixed-Methods Exploration of Physical, Psychological, and Environmental Influences
Source: Research Square preprint supplement (doi:10.21203/rs.3.rs-6693988/v1), 2025-06-16
Supplement: Supplementary file 1 [file 00e5eefa29bd7b9d838471ef.docx]

**Dietary Behaviors in Gaelic Football: A Mixed-Methods Exploration of Physical, Psychological, and Environmental Influences – Supplementary Material**

**Supplementary Table 1.** Interview Question Guide

| COM-B | Sub-Component | Question | Prompts/Follow-Up |
| --- | --- | --- | --- |
| Capability | Psychological | - What do you think an ideal healthy diet looks like? | - What does it look like when you are trying to follow a healthy diet? |
| Physical | - What skills do you think are required to follow a healthy diet? | - E.g. nutrition knowledge, cooking skills, food planning - Do you use any of these skills to follow a healthy diet? Can you provide any examples? - How confident are you in each of the skills you have mentioned? Which would you consider a strength or weakness of yours? |
| Psychological | - Are you aware of any of the current sports nutrition guidelines for your sport? | - If yes, do you consider sports nutrition guidelines when making decisions about eating? Can you give me any examples of this? - If no, what other forms of information or advice do you base you’re eating decisions on? Can you give me any examples of this? |
| Opportunity | Physical | - Do you regularly cook and prepare you own meals? | - If yes, can you tell me about the environment you prepare most of your meals in? - How do you think this environment influences you're eating decisions? - If no, does anyone else regularly cook and prepares meals for you? - Do you purchase ready-prepared meals or eat out often? - How do you think this environment influences you're eating decisions? |
| Physical | - Can you tell me about the environment you eat most of your meals in? | - How do you think the environment influences you’re eating decisions? |
| Social | - Are you influenced by what other people are eating? | - Can you provide any examples of this? - Are you influenced by different people? - E.g. Home environment, peer group |
| Social | - Are you influenced by what other people are drinking? | - Can you provide any examples of this? - Are you influenced by different people? - E.g. Home environment, peer group |
| Social | - Are you influenced by what supplements other people are taking? | - Can you provide any examples of this? - Are you influenced by different people? - E.g. Home environment, peer group |
| Physical | - Do your food choices change when away from home or travelling? | - E.g. consider commuting for work as well as travelling for a competition or holiday |
| Physical | - Are you ever provided with food or supplements surrounding training or competition? | - If yes, what does the food usually consist of? - What supplements are you usually provided with? - Who usually provides it? - Are you concerned about being provided with food/supplements by other people? - If no, do you prepare you own food or supplements for training/competition periods? |
| Physical/Social | - Do you currently have access to a sports nutritionist? | - If yes, how do they work with you on your eating decisions? Does this influence you're eating decisions in anyway? - If no, do you receive nutrition advice or support from anyone else such as a coach or teammate? What kind of advice do they provide? Does this influence you're eating decisions in anyway? |
| Physical/Social | - Can you think of anything else about your environment that either positively or negatively influences your diet? | - E.g. financial constraints, food availability, access to cooking facilities - Can you give some examples of this? |
| Motivation | Reflective | - What motivates your current eating decisions? | - E.g. nutrition beliefs, performance, body composition goals, friends/teammates, role models - Can you give some examples of this? |
| Reflective | - Do your goals in relation to your eating decisions ever change? | - If so, how? - What impact does this have on your motivation? - Does this influence you eating decisions? |
| Reflective | - Do your motivations in relation to you're eating decisions ever change? | - If so, how? - Does this influence you eating decisions? |
| Automatic | - Is there anything that challenges your motivation to follow a healthy diet? | - E.g. mood changes, injury, poor performance, time of season, bad habits, impulses, inhibitions - Can you give some examples of this? |

**Supplementary Table 2**. Consolidated criteria for reporting qualitative studies (COREQ): 32-item checklist

**Developed from**: Tong A, Sainsbury P, Craig J. Consolidated criteria for reporting qualitative research (COREQ): a 32-item checklist for interviews and focus groups. Int J Qual Health Care. 2007 Dec;19(6):349–57.

| **Item No** | | **Guide Questions/Description** | | | **Reported on Page #** |
| --- | --- | --- | --- | --- | --- |
| **Domain 1: Research team and reflexivity** | | | | | |
| **Personal Characteristics** | | | | | |
| 1. Interviewer/ facilitator | | Which author/s conducted the interview or focus group? | | | Pg 11 |
| 2. Credentials | | What were the researcher’s credentials? E.g., PhD, MD | | | Pg 11 |
| 3. Occupation | | What was their occupation at the time of the study? | | | Pg 11 |
| 4. Gender | | Was the researcher male or female? | | | Pg 11 |
| 5. Experience and training | | What experience or training did the researcher have? | | | Pg 11 |
| **Relationship with participants** | | | | | |
| 6. Relationship established | | Was a relationship established prior to study commencement? | | | Pg 8 |
| 7. Participant knowledge of the interviewer | | What did the participants know about the researcher? e.g. personal goals, reasons for doing the research? | | | Pg 11 |
| 8. Interviewer characteristics | | What characteristics were reported about the interviewer/facilitator? e.g. Bias, assumptions, reasons and interests in the research topic | | | Pg 8 |
| **Domain 2: study design** | | | | |
| **Theoretical framework** | | | | |
| 9. Methodological orientation and Theory | | What methodological orientation was stated to underpin the study? e.g. grounded theory, discourse analysis, ethnography, phenomenology, content analysis | | Pg 8, 13 |
| **Participant selection** | | | | |
| 10. Sampling | | How were participants selected? e.g., purposive, convenience, consecutive, snowball | | Pg 8-9 |
| 11. Method of approach | | How were participants approached? e.g., face-to-face, telephone, mail, email | | Pg 9 |
| 12. Sample size | | How many participants were in the study? | | Pg 13 |
| 13. Non-participation Setting | | How many people refused to participate or dropped out? Reasons? | | Pg 13 |
| 14. Setting of data collection | | Where was the data collected? e.g., home, clinic, workplace | | Pg 10 |
| 15. Presence of nonparticipants | | Was anyone else present besides the participants and researchers? | | N/A |
| 16. Description of sample | | What are the important characteristics of the sample? e.g. demographic data, date | | Pg 13-15 |
| **Data collection** | | |  | | | No |
| 17. Interview guide | | Were questions, prompts, and guides provided by the authors? Was it pilot tested? | | Pg 10-11 |
| 18. Repeat interviews | | Were repeat interviews carried out? If yes, how many? | | N/A |
| 19. Audio/visual recording | | Did the research use audio or visual recording to collect the data? | | Pg 11 |
| 20. Field notes | | Were field notes made during and/or after the interview or focus group? | | N/A |
| 21. Duration | | What was the duration of the interviews or focus group? | | Pg 11 |
| 22. Data saturation | | Was data saturation discussed? | | Pg 8-9 |
| 23. Transcripts returned | | Were transcripts returned to participants for comment and/or correction? | | N/A |
| **Domain 3: analysis and findings** | | | | |
| **Data analysis** | | | | |
| 24. Number of data coders | | How many data coders coded the data? | | Pg 13 |
| 25. Description of the coding tree | | Did the authors provide a description of the coding tree? | | N/A |
| 26. Derivation of themes | | Were themes identified in advance or derived from the data? | | Pg 13 |
| 27. Software | | What software, if applicable, was used to manage the data? | | Pg 13 |
| 28. Participant checking | | Did participants provide feedback on the findings? | | N/A |
| **Reporting** | | | | |
| 29. Quotations presented | | Were participant quotations presented to illustrate the themes/findings? Was each quotation identified? e.g., participant number | | Pg 16-28 |
| 30. Data and findings consistent | | Was there consistency between the data presented and the findings? | | Pg 16-28 |
| 31. Clarity of major themes | | Were major themes clearly presented in the findings? | | Pg 16-28 |
| 32. Clarity of minor themes | | Is there a description of diverse cases or a discussion of minor themes? | | Pg 16-28 |
